# Supplementary material for: Synthesis of cellulose nanocrystal armored latex particles for mechanically strong nanocomposite films
Source: Royal Society of Chemistry journal article supplement (doi:10.1039/c8py01785a), 2019-01-01
Supplement: c8py01785a1.pdf [file c8py01785a1.pdf]

## Supporting information

### Synthesis of cellulose nanocrystal armored latex particles for mechanically strong nanocomposite films

Elodie Limousin, Nicholas Ballard\*, José M. Asua

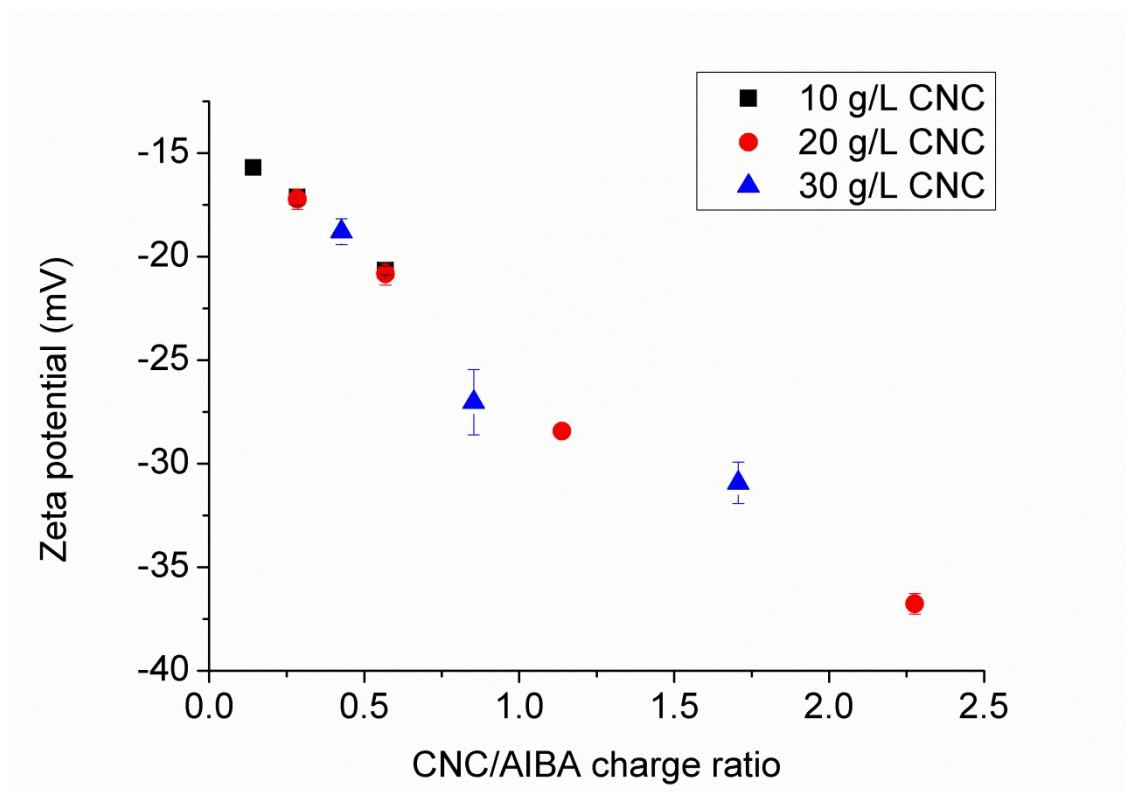

**Figure S1:** Data from Figure 2 of the main manuscript showing the zeta potential of different solutions of cellulose nanocrystals with variation of 2,2'-Azobis(2-methylpropionamide) dihydrochloride plotted as a function of CNC/AIBA charge ratio.

a)

b)

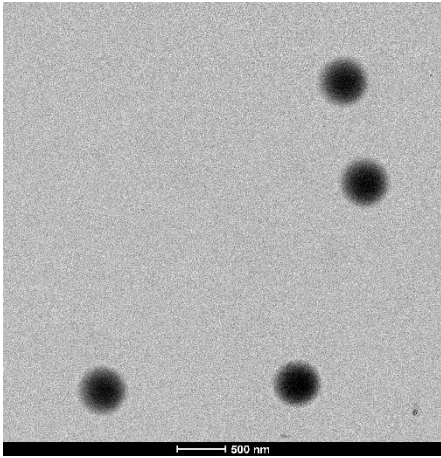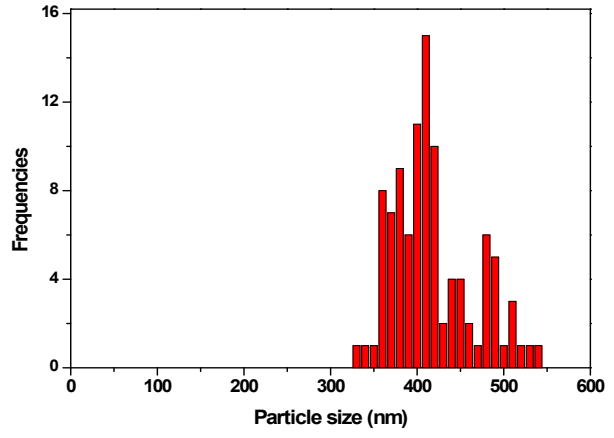

**Figure S2:** a) TEM image of particles from latex L0 (scale bar: 500 nm) and b) Particle size distribution

a)

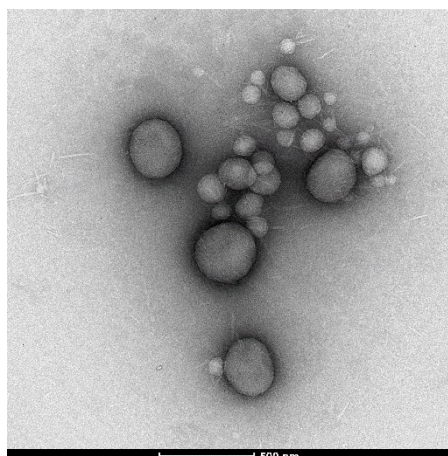

b)

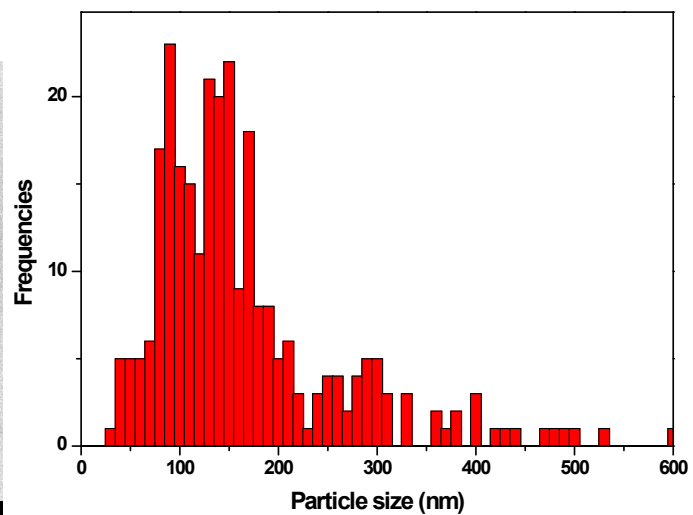

**Figure S3:** a) TEM image of CNCs stabilized particles from latex L1 (scale bar: 500 nm) and b) Particle size distribution

a)

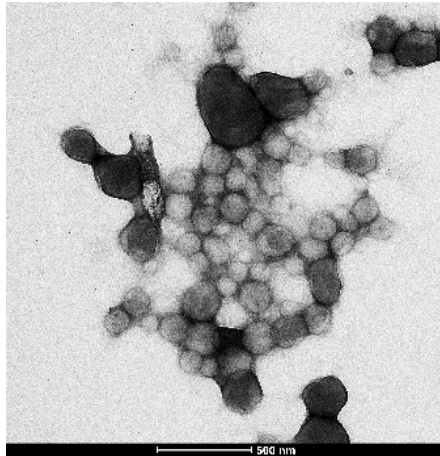

b)

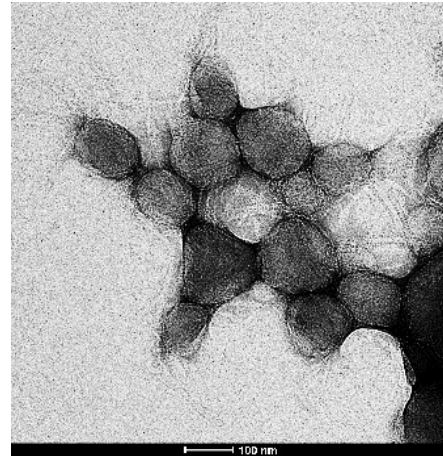

c)

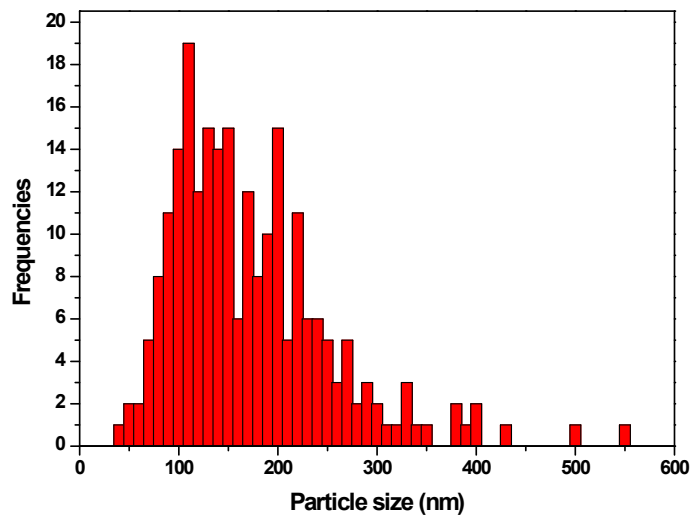

**Figure S4:** TEM images of CNCs stabilized particles from latex L2 (scale bar: a): 500 nm, and b) 100 nm) and c) Particle size distribution

a)

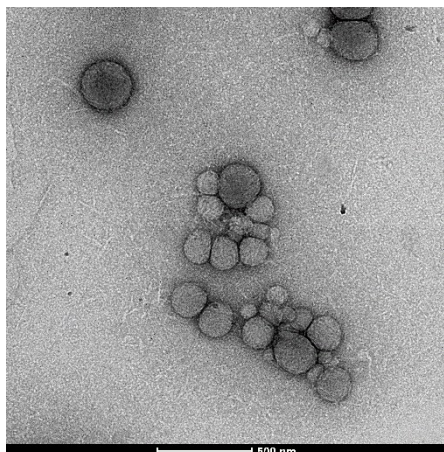

b)

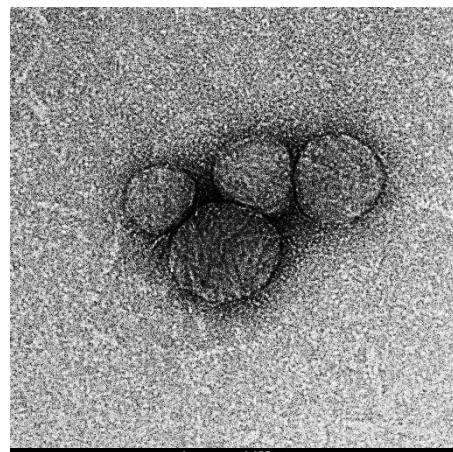

c)

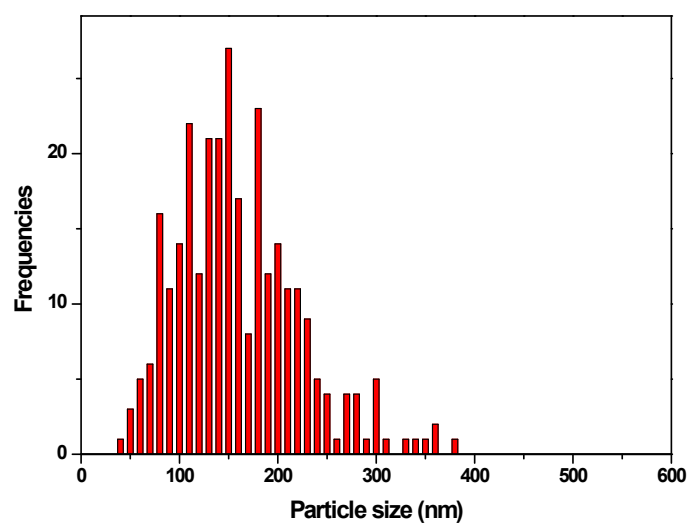

**Figure S5:** TEM images of CNCs stabilized particles from latex L5 (scale bar: a): 500 nm, and b) 100 nm) and c) Particle size distribution

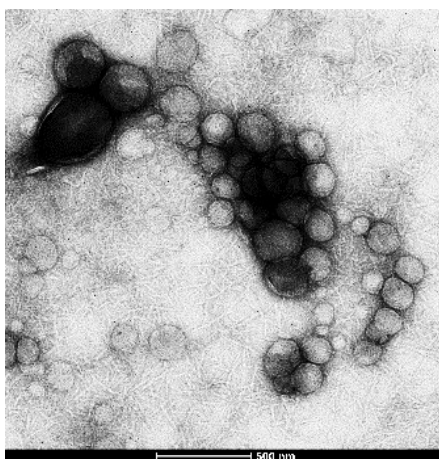

**Figure S6:** TEM image of CNCs stabilized particles from latex L6 (scale bar: 500 nm)

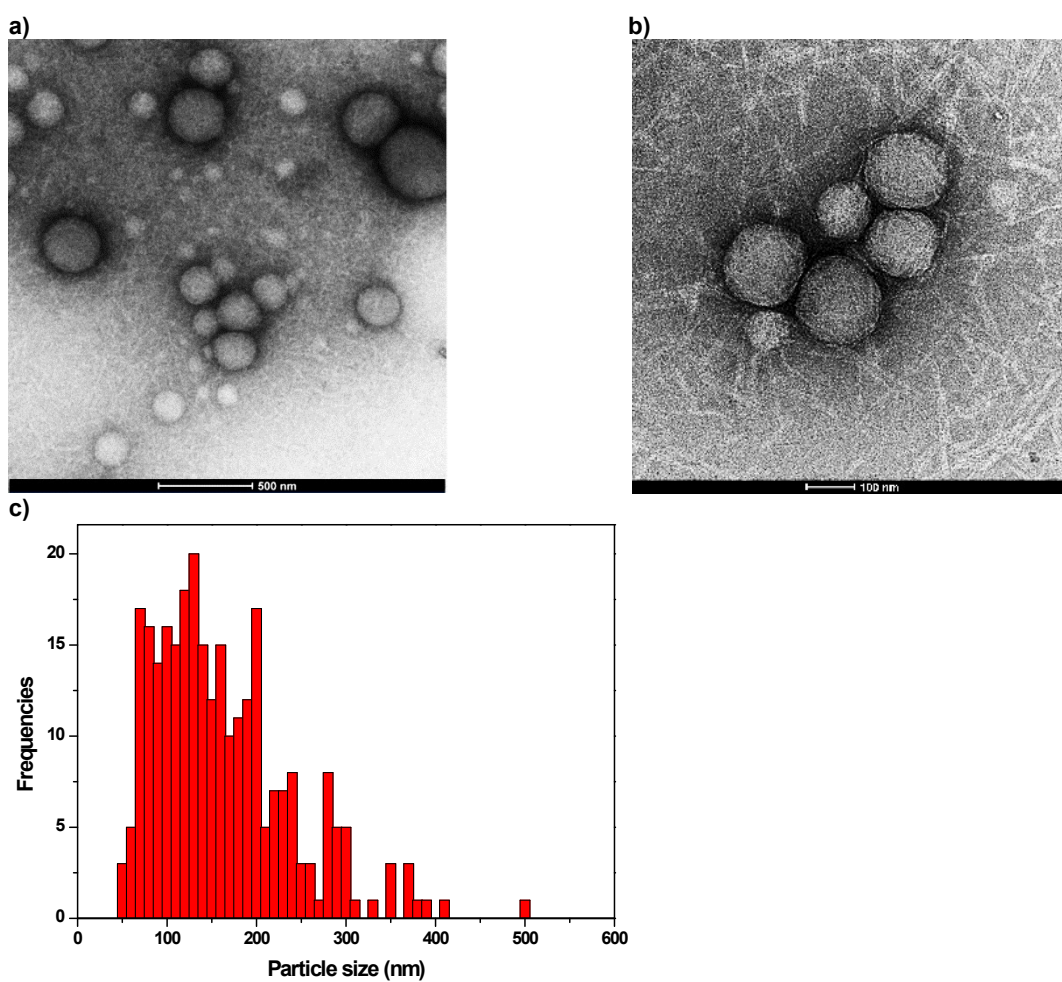

**Figure S7:** TEM images of CNCs stabilized particles from latex L7 (scale bar: a): 500 nm, and b) 100 nm) and c) Particle size distribution

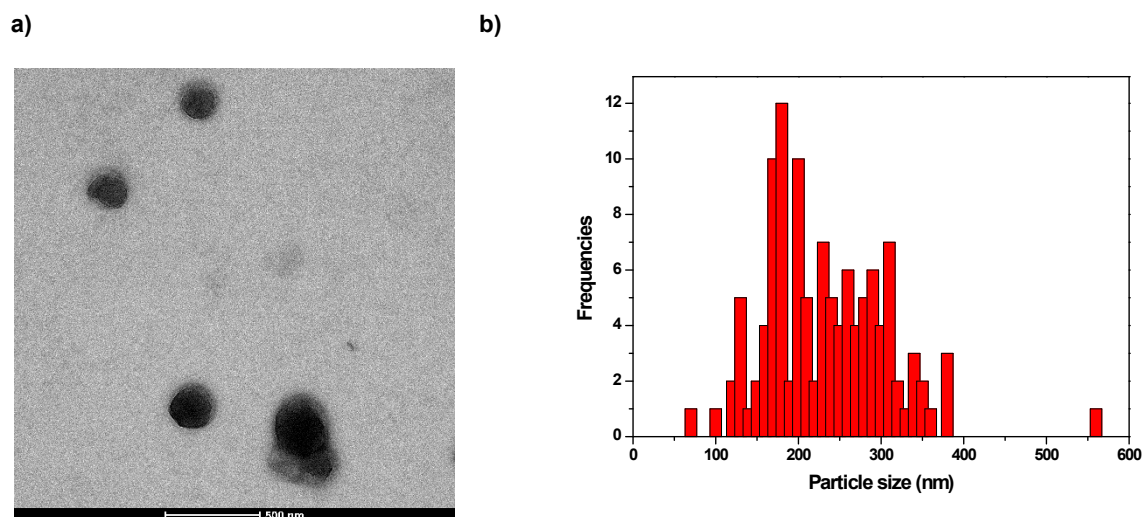

**Figure S8:** a) TEM image of CNCs stabilized particles from latex L9 (scale bar: 500 nm) and b) Particle size distribution

Table S1: Characteristics of the latexes and blends used

|                                        | L5   | L5:L0 9:1 | L5:L0 2:1 | L5:L0 1:1 | L5:L0 1:2 | L0   |
|----------------------------------------|------|-----------|-----------|-----------|-----------|------|
| CNCs (wbm %)                           | 20   | 18        | 13.3      | 10        | 6.66      | 0    |
| Particle size per number ( $d_n$ , nm) | 160  |           |           |           |           | 417  |
| Particle size per weight ( $d_w$ , nm) | 233  |           |           |           |           | 433  |
| Polydispersity ( $d_w/d_n$ )           | 1.45 |           |           |           |           | 1.04 |
| Tg (°C)                                | 35   | 29        | 28        | 28        | 25        | 18   |
| Zeta potential (mV)                    | -31  | -32.5     | -33       | -29.7     | -21.4     | 42.1 |

a)

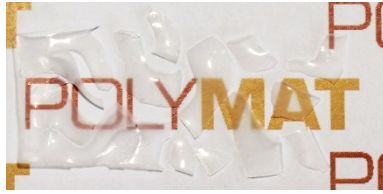

b)

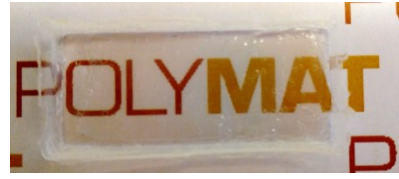

**Figure S9:** Films cast from latex L5 at 55% humidity and a) 23°C and b) 65°C

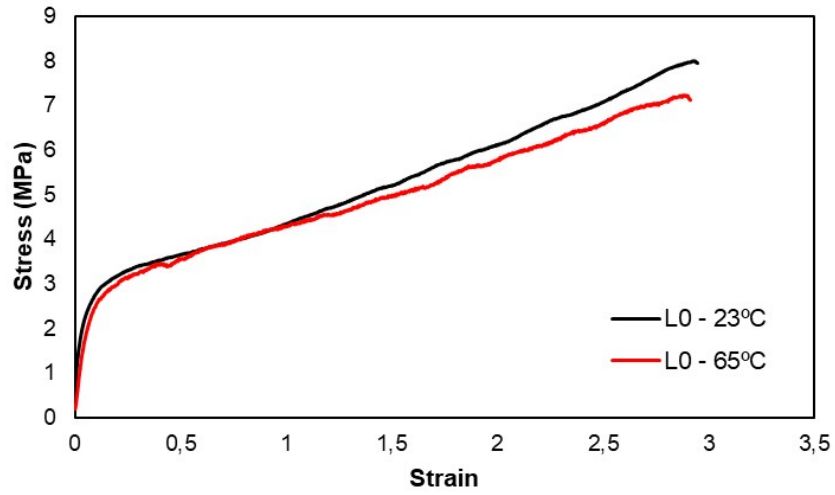

**Figure S10:** Stress-strain curve for the latex L0 dried at 23 °C and 55% relative humidity for 7 days



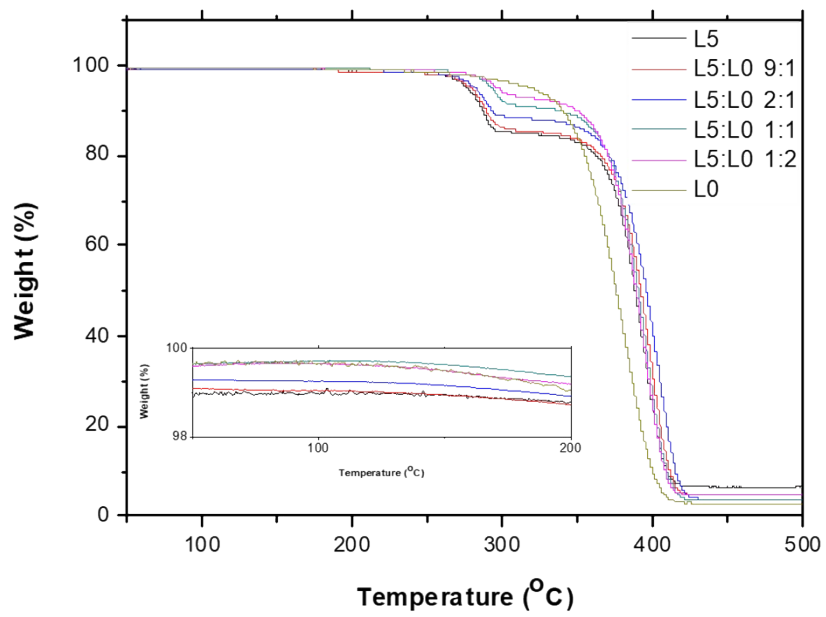

**Figure S11:** Thermogravimetric analysis curves of the films dried at 65 °C for 24h

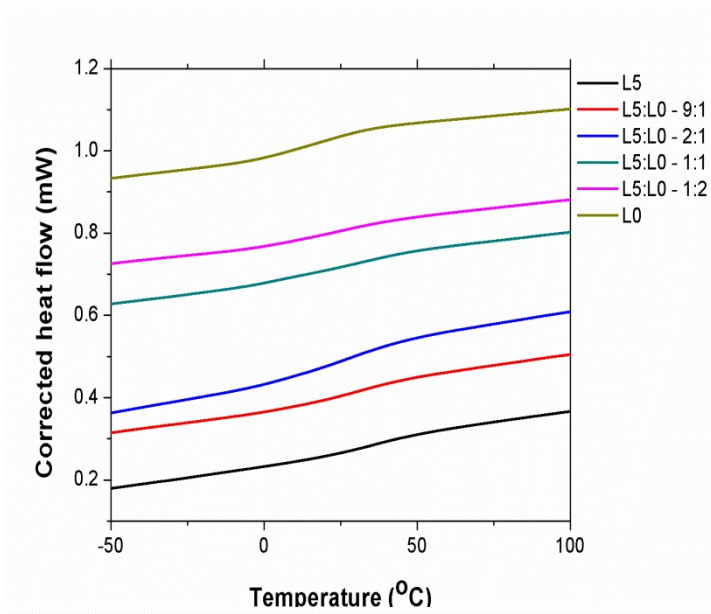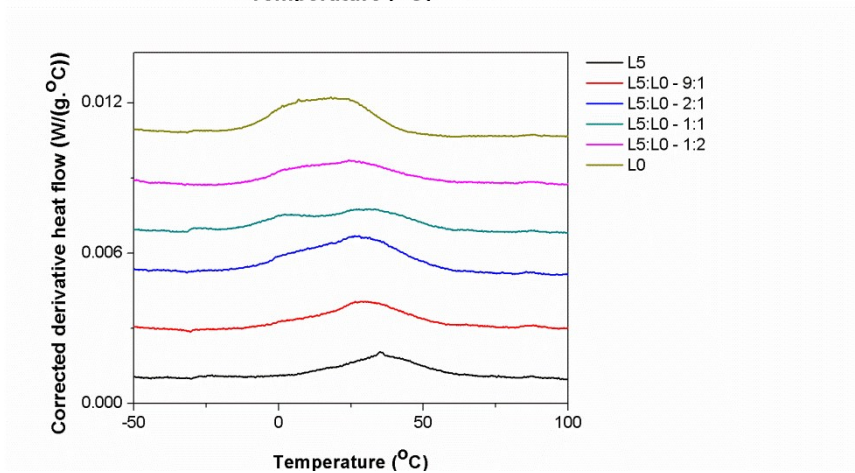

**Figure S12** DSC and first derivative showing the variation in glass transition temperature for films cast from latex L0 , L5 and their blends.
